# Supplementary material for: A Reflectivity Measure to Quantify Bruch's Membrane Calcification in Patients with Pseudoxanthoma Elasticum Using Optical Coherence Tomography
Source: PubMed Central journal article supplement — Transl Vis Sci Technol. 2020 Jul 23;9(8):34. doi: 10.1167/tvst.9.8.34 (PMC7422762; doi:10.1167/tvst.9.8.34), 2020-07-23
Supplement: tvst-9-8-34_s001.pdf [file tvst-9-8-34_s001.pdf]

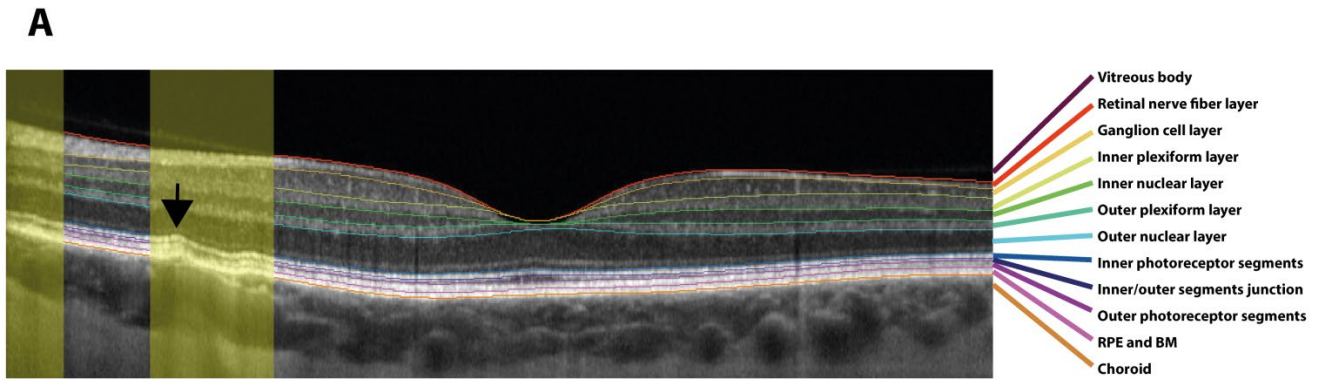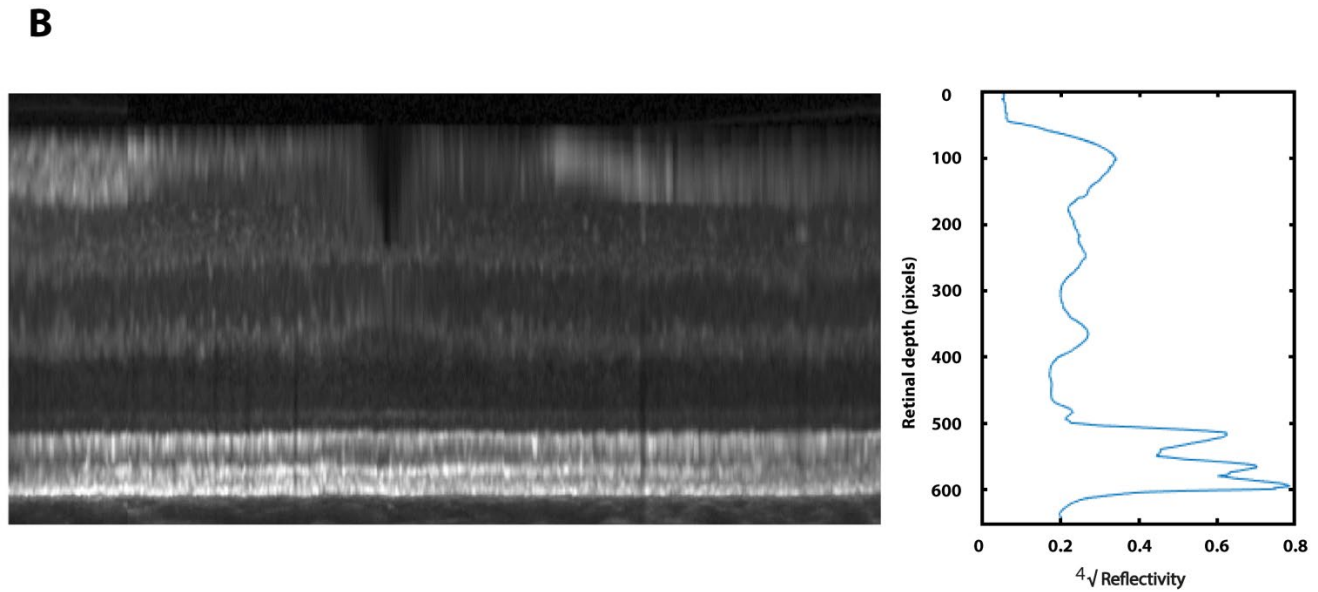

**Supplementary Figure 1. Processing of optical coherence tomography (OCT) imaging**

**A:** Example of automated segmentation of a PXE OCT scan. The colored lines represent the 11 different surfaces and the corresponding retinal layers are presented at the right side. The vertical yellow lines represent A-scans that will be excluded from analysis. In this example, A-scans in which the outer retina was not completely intact were excluded. The black arrow indicates an angiod streak. **B:** For all selected A-scans, each layer was stretched using linear interpolation to the same standardized length of twice the maximum layer thickness within the B-scan. The reflectivity profile was created by taking the weighted median of all pixels at the same depth.
