# Supplementary material for: A Reflectivity Measure to Quantify Bruch's Membrane Calcification in Patients with Pseudoxanthoma Elasticum Using Optical Coherence Tomography
Source: PubMed Central journal article supplement — Transl Vis Sci Technol. 2020 Jul 23;9(8):34. doi: 10.1167/tvst.9.8.34 (PMC7422762; doi:10.1167/tvst.9.8.34), 2020-07-23
Supplement: tvst-9-8-34_s002.pdf [file tvst-9-8-34_s002.pdf]

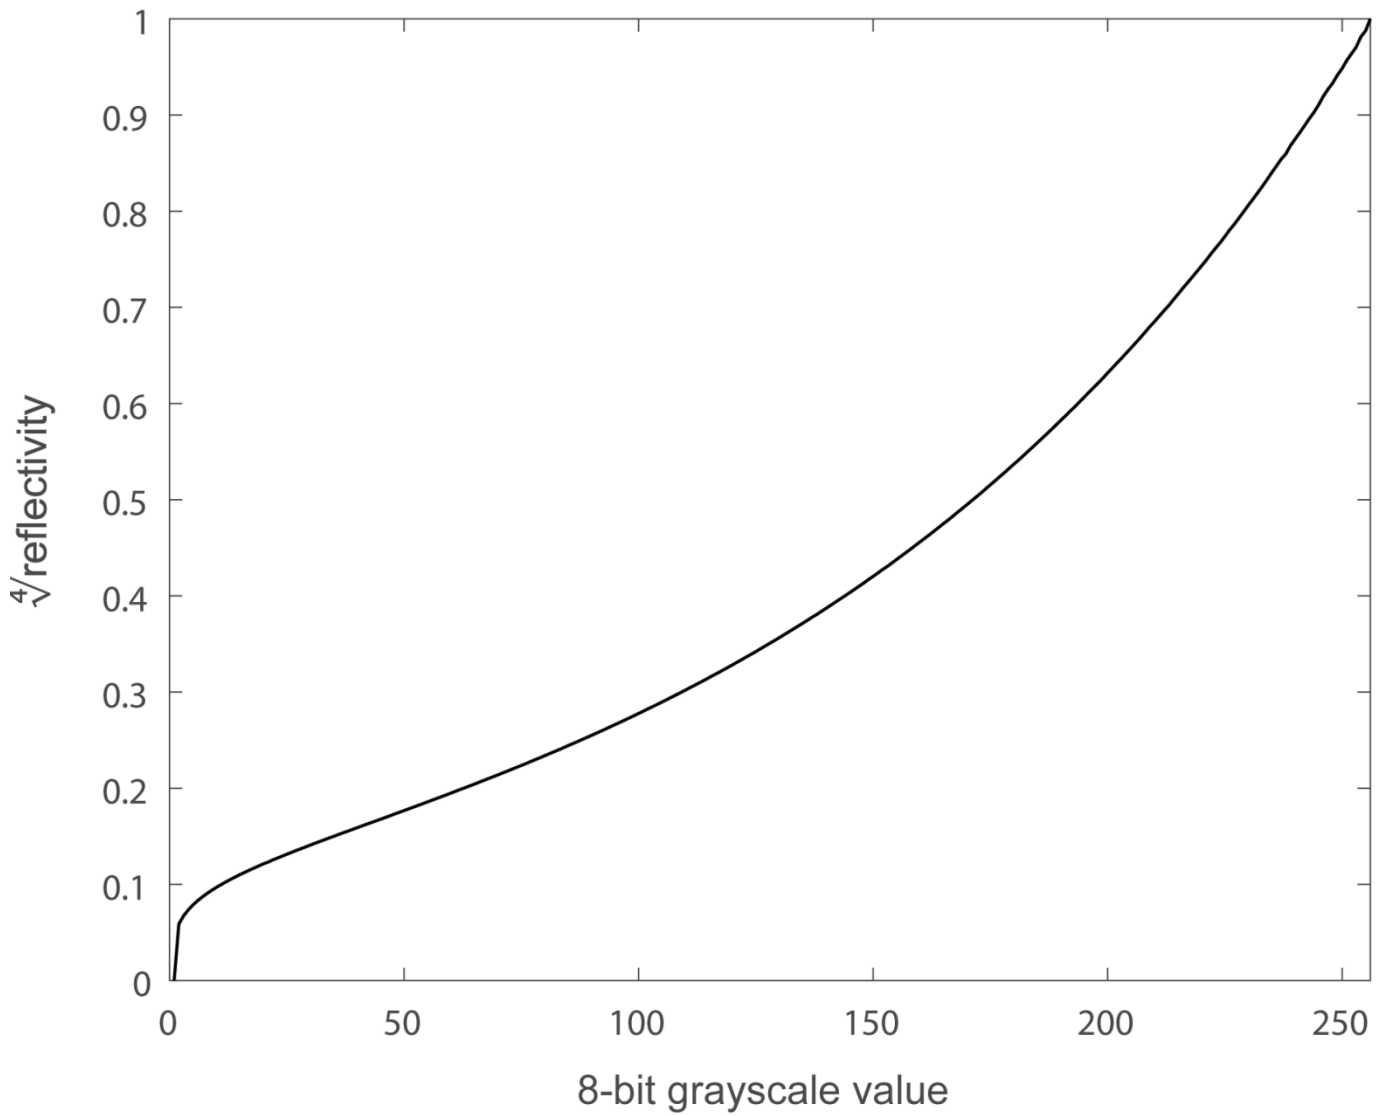

**Supplementary Figure 2. Calibration curve for converting 8-bit grayscale values to reflectivity values for further analysis**

This curve was made by comparing the 8-bit grayscale values from DICOM scans with the corresponding reflectivity values from the raw data (OCT scans as VOL files).
