# Supplementary material for: A Reflectivity Measure to Quantify Bruch's Membrane Calcification in Patients with Pseudoxanthoma Elasticum Using Optical Coherence Tomography
Source: PubMed Central journal article supplement — Transl Vis Sci Technol. 2020 Jul 23;9(8):34. doi: 10.1167/tvst.9.8.34 (PMC7422762; doi:10.1167/tvst.9.8.34), 2020-07-23
Supplement: tvst-9-8-34_s003.pdf [file tvst-9-8-34_s003.pdf]

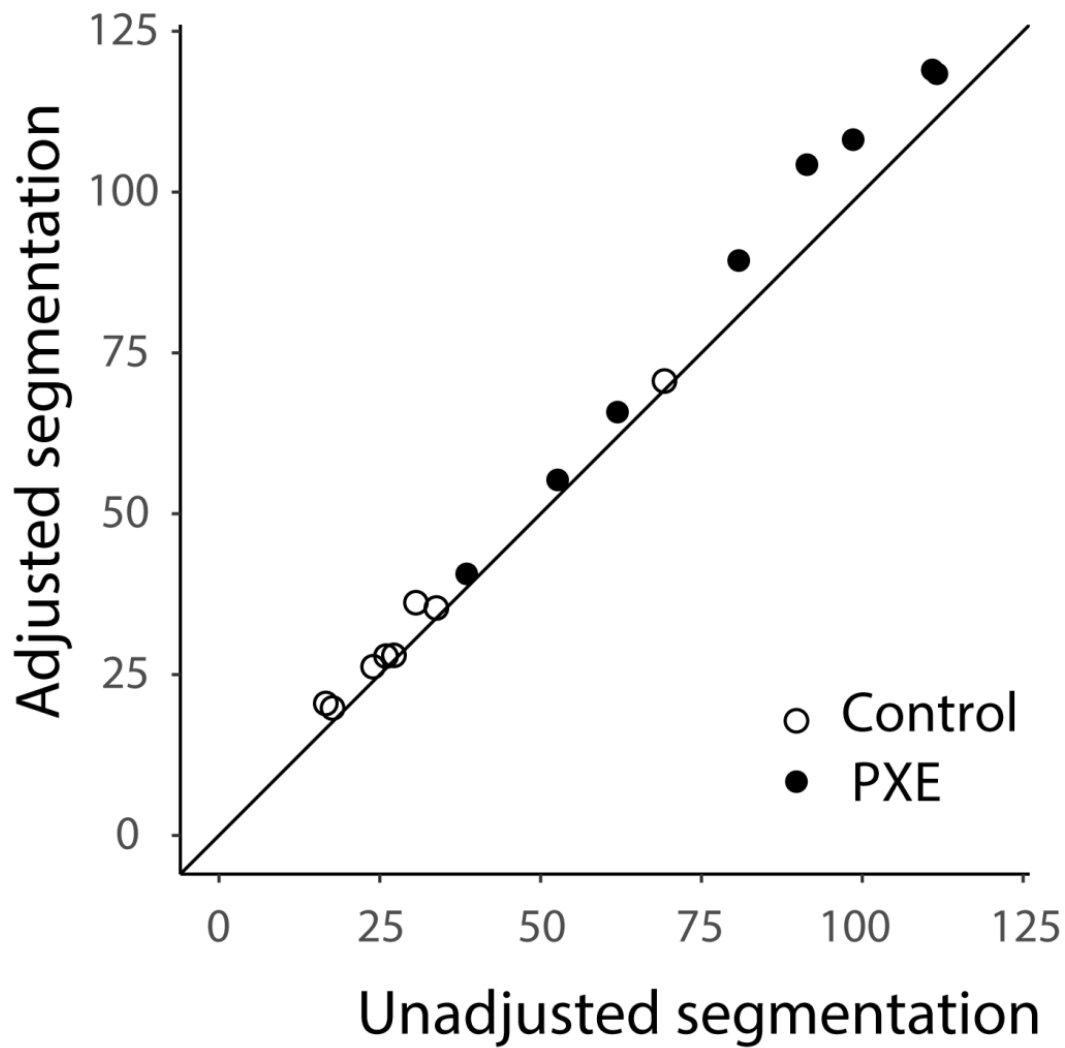

**Supplementary figure 3. Correlation of RPE-BM peak reflectivity for unadjusted segmentation and manual adjustment of segmentation lines**

Correlation of the RPE-BM peak reflectivity for manual adjustment of small segmentation errors for 8 OCT scans of 4 PXE patients and 8 OCT scans of 4 controls. Each OCT scan consisted of 7 B-scans. The diagonal line represents the perfect correlation.
