# Supplementary material for: A Reflectivity Measure to Quantify Bruch's Membrane Calcification in Patients with Pseudoxanthoma Elasticum Using Optical Coherence Tomography
Source: PubMed Central journal article supplement — Transl Vis Sci Technol. 2020 Jul 23;9(8):34. doi: 10.1167/tvst.9.8.34 (PMC7422762; doi:10.1167/tvst.9.8.34), 2020-07-23
Supplement: tvst-9-8-34_s004.pdf [file tvst-9-8-34_s004.pdf]

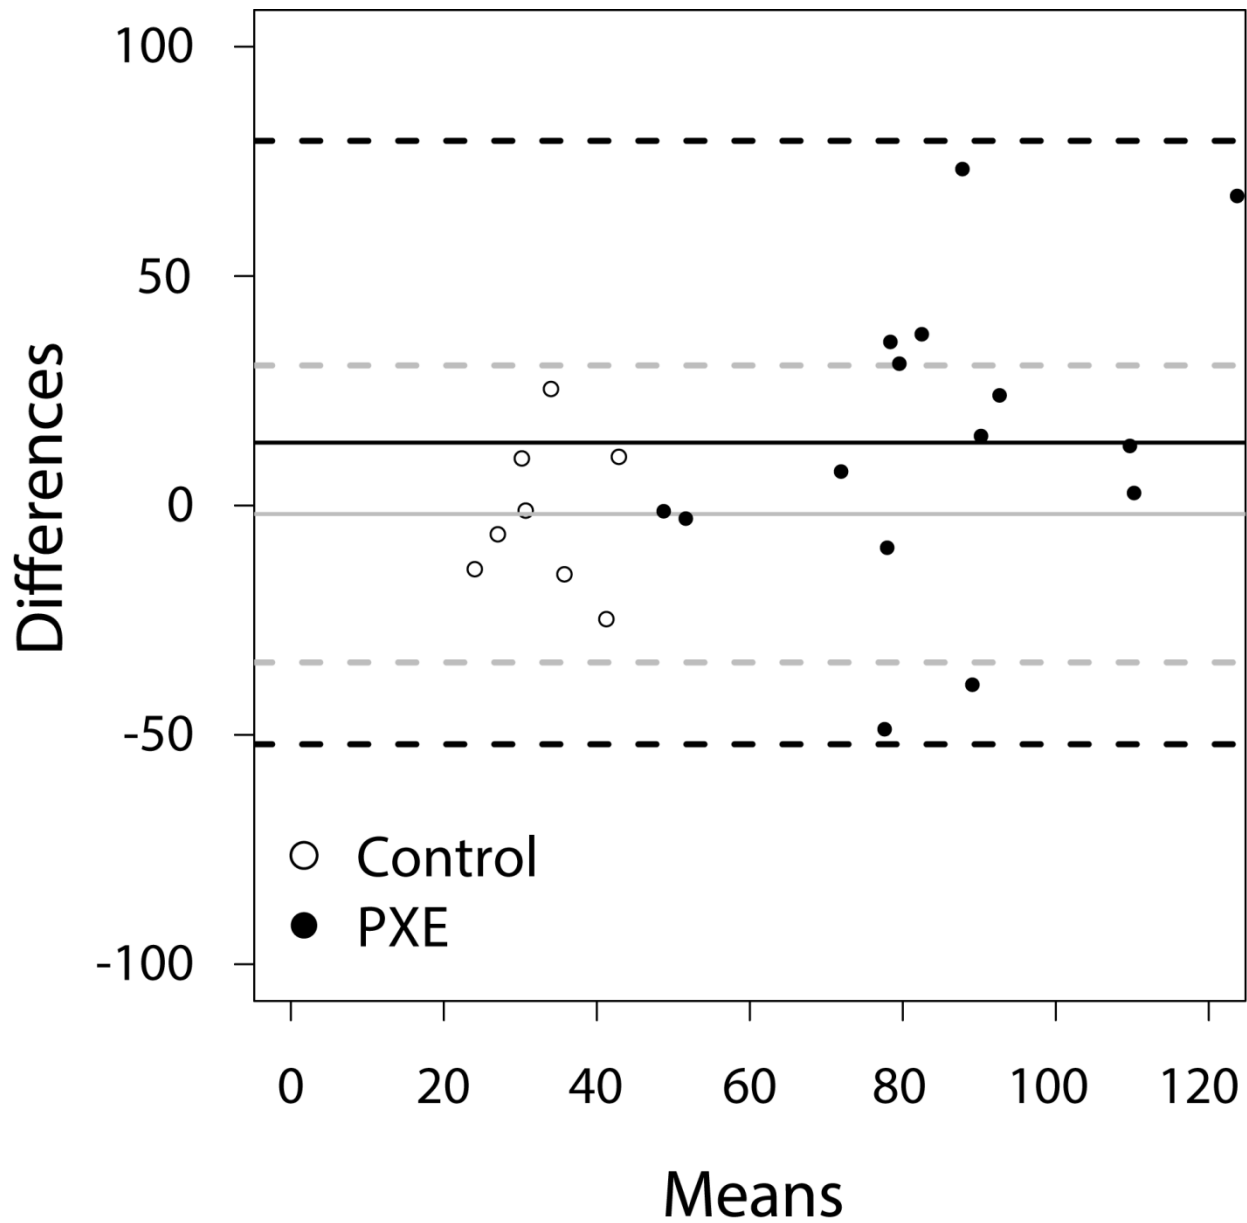

**Supplementary figure 4. Agreement of RPE-BM peak reflectivity**

Bland-Altman plot of repeated RPE-BM peak reflectivity averaged per eye. In total, 8 PXE patients (15 eyes) and 4 controls (8 eyes) had repeated measures within 6 months.
