# Supplementary material for: A Reflectivity Measure to Quantify Bruch's Membrane Calcification in Patients with Pseudoxanthoma Elasticum Using Optical Coherence Tomography
Source: PubMed Central journal article supplement — Transl Vis Sci Technol. 2020 Jul 23;9(8):34. doi: 10.1167/tvst.9.8.34 (PMC7422762; doi:10.1167/tvst.9.8.34), 2020-07-23
Supplement: tvst-9-8-34_s005.pdf [file tvst-9-8-34_s005.pdf]

## Supplementary table 1. Layer specific retinal thickness

| <b>Supplementary Table 1</b>                                                                                         |              |                |                               |                                 |
|----------------------------------------------------------------------------------------------------------------------|--------------|----------------|-------------------------------|---------------------------------|
|                                                                                                                      | <b>PXE</b>   | <b>Control</b> | <b>Nominal <i>P</i>-value</b> | <b>Adjusted <i>P</i>-value*</b> |
|                                                                                                                      | <b>N=45</b>  | <b>N=25</b>    |                               |                                 |
| Total retinal thickness in $\mu\text{m}$                                                                             | 321 $\pm$ 13 | 328 $\pm$ 11   | 0.025                         | 0.051                           |
| <b>Layer specific thickness in <math>\mu\text{m}</math></b>                                                          |              |                |                               |                                 |
| Retinal nerve fiber layer                                                                                            | 34 $\pm$ 2   | 36 $\pm$ 3     | 0.005                         | 0.015                           |
| Ganglion cell layer                                                                                                  | 39 $\pm$ 4   | 41 $\pm$ 4     | 0.069                         | 0.098                           |
| Inner plexiform layer                                                                                                | 38 $\pm$ 3   | 38 $\pm$ 2     | 0.862                         | 0.862                           |
| Inner nuclear layer                                                                                                  | 33 $\pm$ 2   | 35 $\pm$ 2     | 0.006                         | 0.015                           |
| Outer plexiform layer                                                                                                | 28 $\pm$ 3   | 28 $\pm$ 2     | 0.465                         | 0.517                           |
| Outer nuclear layer                                                                                                  | 82 $\pm$ 7   | 85 $\pm$ 6     | 0.081                         | 0.101                           |
| Ellipsoid zone                                                                                                       | 27 $\pm$ 1   | 26 $\pm$ 1     | 0.001                         | 0.005                           |
| Outer photoreceptor segments                                                                                         | 20 $\pm$ 4   | 19 $\pm$ 2     | 0.062                         | 0.098                           |
| RPE and Bruch's membrane                                                                                             | 19 $\pm$ 2   | 21 $\pm$ 2     | 1.97 $\times 10^{-4}$         | 0.002                           |
| Values are presented as mean $\pm$ standard deviation. <i>P</i> -values were based on the two-sample <i>t</i> -test. |              |                |                               |                                 |
| * <i>P</i> -values were adjusted according to the method as proposed by Benjamini and Hochmann.                      |              |                |                               |                                 |
