# Supplementary material for: A Reflectivity Measure to Quantify Bruch's Membrane Calcification in Patients with Pseudoxanthoma Elasticum Using Optical Coherence Tomography
Source: PubMed Central journal article supplement — Transl Vis Sci Technol. 2020 Jul 23;9(8):34. doi: 10.1167/tvst.9.8.34 (PMC7422762; doi:10.1167/tvst.9.8.34), 2020-07-23
Supplement: tvst-9-8-34_s006.pdf [file tvst-9-8-34_s006.pdf]

**Supplementary table 2. Age specific median and peak reflectivity of the retinal layers in PXE patients**

| <b>Supplementary Table 2</b>                                                            |                              |                       |                      |                      |                       |                    |
|-----------------------------------------------------------------------------------------|------------------------------|-----------------------|----------------------|----------------------|-----------------------|--------------------|
|                                                                                         | <b>Layer</b>                 | <b>Under 20 years</b> | <b>20 – 30 years</b> | <b>30 – 40 years</b> | <b>Nominal P</b>      | <b>Adjusted P*</b> |
|                                                                                         |                              | n = 7                 | n = 22               | n = 16               |                       |                    |
| <b>Median layer reflectivity</b>                                                        | Retinal nerve fiber layer    | 2.74 [2.23, 2.98]     | 2.26 [2.05, 2.64]    | 2.06 [1.87, 2.33]    | 0.04                  | 0.22               |
|                                                                                         | Ganglion cell layer          | 0.69 [0.64, 0.74]     | 0.72 [0.67, 0.74]    | 0.73 [0.67, 0.76]    | 0.49                  | 0.69               |
|                                                                                         | Inner plexiform layer        | 0.74 [0.69, 0.76]     | 0.78 [0.74, 0.83]    | 0.78 [0.73, 0.82]    | 0.23                  | 0.69               |
|                                                                                         | Inner nuclear layer          | 0.31 [0.30, 0.36]     | 0.39 [0.34, 0.40]    | 0.37 [0.33, 0.39]    | 0.29                  | 0.69               |
|                                                                                         | Outer plexiform layer        | 0.61 [0.56, 0.69]     | 0.68 [0.57, 0.80]    | 0.65 [0.56, 0.68]    | 0.50                  | 0.69               |
|                                                                                         | Outer nuclear layer          | 0.19 [0.18, 0.21]     | 0.24 [0.17, 0.28]    | 0.23 [0.19, 0.25]    | 0.64                  | 0.83               |
|                                                                                         | Ellipsoid zone               | 13.51 [11.12, 22.54]  | 14.52 [9.94, 19.90]  | 13.04 [8.07, 19.40]  | 0.78                  | 0.86               |
|                                                                                         | Outer photoreceptor segments | 11.23 [9.20, 17.71]   | 14.61 [11.50, 23.39] | 15.12 [8.46, 24.03]  | 0.93                  | 0.93               |
|                                                                                         | RPE and Bruch's membrane     | 26.51 [24.11, 46.00]  | 43.20 [26.53, 51.31] | 39.97 [30.40, 53.56] | 0.45                  | 0.69               |
| <b>Peak layer reflectivity</b>                                                          | Retinal nerve fiber layer    | 6.63 [5.90, 8.45]     | 5.15 [4.18, 5.86]    | 4.48 [4.14, 5.24]    | 4.15×10 <sup>-3</sup> | 0.06               |
|                                                                                         | Ganglion cell layer          | 3.69 [3.46, 3.81]     | 3.31 [2.96, 3.59]    | 3.03 [2.82, 3.31]    | 0.01                  | 0.06               |
|                                                                                         | Inner plexiform layer        | 0.93 [0.85, 0.99]     | 1.02 [0.95, 1.06]    | 0.99 [0.94, 1.05]    | 0.25                  | 0.69               |
|                                                                                         | Inner nuclear layer          | 0.73 [0.69, 0.84]     | 0.88 [0.77, 0.91]    | 0.81 [0.77, 0.87]    | 0.28                  | 0.69               |
|                                                                                         | Outer plexiform layer        | 0.90 [0.78, 1.02]     | 0.97 [0.82, 1.14]    | 0.89 [0.78, 0.95]    | 0.39                  | 0.69               |
|                                                                                         | Outer nuclear layer          | 0.67 [0.62, 0.69]     | 0.77 [0.65, 0.88]    | 0.70 [0.58, 0.82]    | 0.46                  | 0.69               |
|                                                                                         | Ellipsoid zone               | 35.63 [27.83, 59.33]  | 40.63 [28.46, 55.96] | 35.33 [22.35, 58.01] | 0.81                  | 0.86               |
|                                                                                         | Outer photoreceptor segments | 19.61 [16.85, 31.37]  | 28.40 [21.99, 43.17] | 26.80 [18.90, 44.33] | 0.76                  | 0.86               |
|                                                                                         | RPE and Bruch's membrane     | 44.24 [40.52, 74.62]  | 65.99 [45.09, 83.80] | 70.76 [49.02, 88.02] | 0.47                  | 0.69               |
| Abbreviations: PXE; pseudoxanthoma elasticum, RPE; retinal pigment epithelium.          |                              |                       |                      |                      |                       |                    |
| All reflectivity values are normalized to the GCL-IPL layer.                            |                              |                       |                      |                      |                       |                    |
| * P-values were adjusted according to the method as proposed by Benjamini and Hochmann. |                              |                       |                      |                      |                       |                    |
