# Supplementary material for: A Reflectivity Measure to Quantify Bruch's Membrane Calcification in Patients with Pseudoxanthoma Elasticum Using Optical Coherence Tomography
Source: PubMed Central journal article supplement — Transl Vis Sci Technol. 2020 Jul 23;9(8):34. doi: 10.1167/tvst.9.8.34 (PMC7422762; doi:10.1167/tvst.9.8.34), 2020-07-23
Supplement: tvst-9-8-34_s007.pdf [file tvst-9-8-34_s007.pdf]

**Supplementary table 3. Layer-specific within-eye and within-patient correlation of median reflectivity values.**

| Supplementary Table 3 |                       |                                                          |                         |                           |                        |                         |                           |                        |
|-----------------------|-----------------------|----------------------------------------------------------|-------------------------|---------------------------|------------------------|-------------------------|---------------------------|------------------------|
|                       |                       | PXE                                                      |                         |                           | Controls               |                         |                           |                        |
| Retinal layer         |                       | Spearman's $\rho$                                        | <i>P</i> -value Nominal | <i>P</i> -value Adjusted* | Spearman's $\rho$      | <i>P</i> -value Nominal | <i>P</i> -value Adjusted* |                        |
| <b>Within eye</b>     | Horizontal & vertical | Retinal nerve fiber layer                                | 0.57                    | $6.05 \times 10^{-10}$    | $7.77 \times 10^{-10}$ | 0.61                    | $1.91 \times 10^{-5}$     | $3.44 \times 10^{-5}$  |
|                       |                       | Ganglion cell layer                                      | 0.37                    | $1.44 \times 10^{-4}$     | $1.44 \times 10^{-4}$  | 0.04                    | 0.90                      | 0.80                   |
|                       |                       | Inner plexiform layer                                    | 0.39                    | $6.09 \times 10^{-5}$     | $6.85 \times 10^{-5}$  | 0.19                    | 0.24                      | 0.27                   |
|                       |                       | Inner nuclear layer                                      | 0.59                    | $7.13 \times 10^{-11}$    | $1.07 \times 10^{-10}$ | 0.39                    | 0.01                      | 0.01                   |
|                       |                       | Outer plexiform layer                                    | 0.70                    | $3.08 \times 10^{-16}$    | $6.93 \times 10^{-16}$ | 0.56                    | $1.35 \times 10^{-4}$     | $2.03 \times 10^{-4}$  |
|                       |                       | Outer nuclear layer                                      | 0.69                    | $9.42 \times 10^{-16}$    | $1.70 \times 10^{-15}$ | 0.64                    | $7.33 \times 10^{-6}$     | $1.65 \times 10^{-5}$  |
|                       |                       | Ellipsoid zone                                           | 0.72                    | $<2.2 \times 10^{-16}$    | $<2.2 \times 10^{-16}$ | 0.82                    | $8.12 \times 10^{-11}$    | $7.31 \times 10^{-10}$ |
|                       |                       | Outer photoreceptor segments<br>RPE and Bruch's membrane | 0.72                    | $<2.2 \times 10^{-16}$    | $<2.2 \times 10^{-16}$ | 0.76                    | $1.05 \times 10^{-8}$     | $4.72 \times 10^{-8}$  |
| <b>Within patient</b> | Left & right eye      | Retinal nerve fiber layer                                | 0.37                    | 0.05                      | 0.05                   | 0.41                    | 0.09                      | 0.10                   |
|                       |                       | Ganglion cell layer                                      | -0.06                   | 0.76                      | 0.76                   | 0.26                    | 0.27                      | 0.27                   |
|                       |                       | Inner plexiform layer                                    | 0.57                    | $1.23 \times 10^{-3}$     | $2.77 \times 10^{-3}$  | 0.67                    | $1.83 \times 10^{-3}$     | 0.01                   |
|                       |                       | Inner nuclear layer                                      | 0.57                    | $1.13 \times 10^{-3}$     | $2.77 \times 10^{-3}$  | 0.46                    | 0.04                      | 0.06                   |
|                       |                       | Outer plexiform layer                                    | 0.49                    | 0.01                      | 0.01                   | 0.58                    | 0.01                      | 0.02                   |
|                       |                       | Outer nuclear layer                                      | 0.51                    | $4.45 \times 10^{-3}$     | 0.01                   | 0.49                    | 0.03                      | 0.05                   |
|                       |                       | Ellipsoid zone                                           | 0.68                    | $5.73 \times 10^{-5}$     | $2.58 \times 10^{-4}$  | 0.55                    | 0.01                      | 0.02                   |
|                       |                       | Outer photoreceptor segments<br>RPE and Bruch's membrane | 0.75                    | $2.36 \times 10^{-6}$     | $2.12 \times 10^{-5}$  | 0.67                    | $1.83 \times 10^{-3}$     | 0.01                   |

Abbreviations: PXE; pseudoxanthoma elasticum, RPE; retinal pigment epithelium  
 \* *P*-values were adjusted according to the method as proposed by Benjamini and Hochmann.
