# Supplementary material for: A Reflectivity Measure to Quantify Bruch's Membrane Calcification in Patients with Pseudoxanthoma Elasticum Using Optical Coherence Tomography
Source: PubMed Central journal article supplement — Transl Vis Sci Technol. 2020 Jul 23;9(8):34. doi: 10.1167/tvst.9.8.34 (PMC7422762; doi:10.1167/tvst.9.8.34), 2020-07-23
Supplement: tvst-9-8-34_s008.pdf [file tvst-9-8-34_s008.pdf]

**Supplementary table 4. The effect of manual adjustment of small segmentation errors on reflectivity and retinal layer thickness for PXE patients and controls.**

| <b>Supplementary Table 4</b>                                                                                                                                                                                                                                                                                                                                                                                                                                                    |                              |                                |                |
|---------------------------------------------------------------------------------------------------------------------------------------------------------------------------------------------------------------------------------------------------------------------------------------------------------------------------------------------------------------------------------------------------------------------------------------------------------------------------------|------------------------------|--------------------------------|----------------|
|                                                                                                                                                                                                                                                                                                                                                                                                                                                                                 | <b>Adjusted segmentation</b> | <b>Unadjusted segmentation</b> | <b>P-value</b> |
| <b>PXE patients</b>                                                                                                                                                                                                                                                                                                                                                                                                                                                             | <b>N=8</b>                   | <b>N=8</b>                     |                |
| GCL-IPL reflectivity                                                                                                                                                                                                                                                                                                                                                                                                                                                            | 0.0059 ± 0.002               | 0.0064 ± 0.002                 | 0.666          |
| RPE-BM peak reflectivity                                                                                                                                                                                                                                                                                                                                                                                                                                                        | 87.6 ± 33.1                  | 80.8 ± 27.3                    | 0.643          |
| <b>Layer specific thickness in µm</b>                                                                                                                                                                                                                                                                                                                                                                                                                                           |                              |                                |                |
| Retinal nerve fiber layer                                                                                                                                                                                                                                                                                                                                                                                                                                                       | 32.8 ± 5.1                   | 35.1 ± 5.4                     | 0.398          |
| Ganglion cell layer                                                                                                                                                                                                                                                                                                                                                                                                                                                             | 40 ± 6.5                     | 38.7 ± 6.6                     | 0.699          |
| Inner plexiform layer                                                                                                                                                                                                                                                                                                                                                                                                                                                           | 37.4 ± 2.1                   | 38.1 ± 2.1                     | 0.515          |
| Inner nuclear layer                                                                                                                                                                                                                                                                                                                                                                                                                                                             | 33.8 ± 3.5                   | 33.6 ± 3.3                     | 0.884          |
| Outer plexiform layer                                                                                                                                                                                                                                                                                                                                                                                                                                                           | 28 ± 3.5                     | 28.2 ± 3.4                     | 0.917          |
| Outer nuclear layer                                                                                                                                                                                                                                                                                                                                                                                                                                                             | 83.5 ± 3.5                   | 83.2 ± 3.5                     | 0.869          |
| Ellipsoid zone                                                                                                                                                                                                                                                                                                                                                                                                                                                                  | 26.2 ± 1.5                   | 26.2 ± 1.5                     | 0.964          |
| Outer photoreceptor segments                                                                                                                                                                                                                                                                                                                                                                                                                                                    | 19.5 ± 3.9                   | 19.5 ± 3.9                     | 0.995          |
| RPE and Bruch's membrane                                                                                                                                                                                                                                                                                                                                                                                                                                                        | 19.7 ± 1.9                   | 19.7 ± 1.8                     | 0.999          |
| <b>Controls</b>                                                                                                                                                                                                                                                                                                                                                                                                                                                                 | <b>N=8</b>                   | <b>N=8</b>                     |                |
| GCL-IPL reflectivity                                                                                                                                                                                                                                                                                                                                                                                                                                                            | 0.0111 ± 0.0035              | 0.0122 ± 0.0041                | 0.575          |
| RPE-BM peak reflectivity                                                                                                                                                                                                                                                                                                                                                                                                                                                        | 33.1 ± 16.3                  | 30.6 ± 16.7                    | 0.770          |
| <b>Layer specific thickness in µm</b>                                                                                                                                                                                                                                                                                                                                                                                                                                           |                              |                                |                |
| Retinal nerve fiber layer                                                                                                                                                                                                                                                                                                                                                                                                                                                       | 34.3 ± 6.2                   | 36.4 ± 5.6                     | 0.479          |
| Ganglion cell layer                                                                                                                                                                                                                                                                                                                                                                                                                                                             | 39.6 ± 4.4                   | 38.8 ± 5.1                     | 0.743          |
| Inner plexiform layer                                                                                                                                                                                                                                                                                                                                                                                                                                                           | 39.2 ± 3.1                   | 39.6 ± 3                       | 0.760          |
| Inner nuclear layer                                                                                                                                                                                                                                                                                                                                                                                                                                                             | 35.2 ± 2.4                   | 35.4 ± 2.7                     | 0.881          |
| Outer plexiform layer                                                                                                                                                                                                                                                                                                                                                                                                                                                           | 27.2 ± 1.9                   | 27.2 ± 1.8                     | 0.977          |
| Outer nuclear layer                                                                                                                                                                                                                                                                                                                                                                                                                                                             | 86.6 ± 3.3                   | 86.4 ± 3                       | 0.898          |
| Ellipsoid zone                                                                                                                                                                                                                                                                                                                                                                                                                                                                  | 27.2 ± 1.7                   | 27.2 ± 1.7                     | 0.934          |
| Outer photoreceptor segments                                                                                                                                                                                                                                                                                                                                                                                                                                                    | 18.4 ± 2.9                   | 18.4 ± 2.9                     | 0.997          |
| RPE and Bruch's membrane                                                                                                                                                                                                                                                                                                                                                                                                                                                        | 20.6 ± 2.7                   | 20.6 ± 2.7                     | 0.997          |
| <p>Values are presented as mean ± standard deviation. <i>P</i>-values were based on the two-sample <i>t</i>-test. The number represents the amount of OCT-scans. Each OCT scan consisted of 7 B-scans. The segmentation was manually adjusted in one group and compared with the unadjusted segmentation.</p> <p>Abbreviations: PXE; pseudoxanthoma elasticum, GCL; ganglion cell layer, IPL; inner plexiform layer, RPE; retinal pigment epithelium, BM; Bruch's membrane.</p> |                              |                                |                |
